# Supplementary material
Source: Research Square preprint supplement (doi:10.21203/rs.3.rs-9373076/v1)
Supplement: Supplementary file 1 [file 620ec2f85cb393477798085c.docx]

**Supplementary Information: Revised Dust Content and Grain Size of Exposed Water Ice at the North Pole of Mars**

**Pari Mohan1, Aditya R. Khuller2**

1 University of Edinburgh, Edinburgh, Scotland.

2 Polar Science Center, Applied Physics Laboratory, University of Washington, Seattle, WA, USA.

Corresponding author: Aditya Khuller ([akhuller@uw.edu](mailto:akhuller@uw.edu))

**Figure S1.** Imaginary index of refraction for Mars dust 44 and H2O ice 42,43 used in our calculations.

**Figure S2.** Surface kinetic temperatures at Point B (85.2°N, 42.5°E) as a function of season (solar longitude) and local solar time, measured by the Mars Thermal Emission Spectrometer instrument 94.

**Appendix A: Calculating Single-Scattering Properties of a Mixture**

Let be the mass fraction, or mass-mixing-ratio of dust, so that , where is the mass fraction of ice.

Flanner, et al. 41 define a layer mass burden as (their Equation 2):

|  | (1) |
| --- | --- |

where is the total density of a given layer of thickness measured in the field. Thus, the total layer mass burden is .

The optical depth of dust is given by (their Equation 1):

|  | (2) |
| --- | --- |

where the mass-extinction coefficient for dust is:

|  | (3) |
| --- | --- |

where is the density of dust, is the grain radius of dust, and is the dimensionless extinction efficiency calculated using Mie theory.

The optical depth of ice alone is obtained by removing the dust contribution to the layer mass burden from the total mass burden (from their Equation 3):

|  | (4) |
| --- | --- |

Since ,

|  | (5) |
| --- | --- |

**A1: Single-Scattering Albedo**

The single-scattering albedo of a mixture (of dust and ice in this example) is given by Equation 5 of Flanner, et al. 41:

|  | (6) |
| --- | --- |

Using the values of and derived above,

|  | (7) |
| --- | --- |

Simplifying step-by-step,

|  | (8) |
| --- | --- |

Now, , where is the mass-scattering coefficient. So,

|  | (9) |
| --- | --- |
|  |  |

**A2: Asymmetry Parameter**

The asymmetry parameter of a mixture (of dust and ice) is given by using Equation 6 of Flanner, et al. 41

|  | (10) |
| --- | --- |

Since , we can also write this as:

|  | (11) |
| --- | --- |

Since , and cancel out,

|  | (12) |
| --- | --- |

Finally, we obtain

|  | (13) |
| --- | --- |

**A3: Optical Depth**

The asymmetry parameter of a mixture (of dust and ice in this example) is given by using Equation 4 of Flanner, et al. 41:

|  | (14) |
| --- | --- |

Simplifying, we obtain

|  | (15) |
| --- | --- |
